# Supplementary material for: Hypobaric hypoxia induced renal damage is mediated by altering redox pathway
Source: PubMed Central journal article supplement (PMC6044529; doi:10.1371/journal.pone.0195701), 2018-07-13
Supplement: pone.0195701.s002.pdf [file pone.0195701.s002.pdf]

# **MASCOT** Mascot Search Results

**User** :  
**Email** :  
**Search title** : ABSCIEX SERVICE\150916-DRDO\MSMS 2\G4  
**Database** : NCBIInr 29112011 (13841106 sequences; 4750259772 residues)  
**Taxonomy** : Rattus (67132 sequences)  
**Timestamp** : 22 Sep 2016 at 06:50:35 GMT  
**Warning** : **A Peptide summary report will usually give a much clearer picture of MS/MS search results**  
**Top Score** : 189 for **gi|13591894**, alcohol dehydrogenase [NADP+] [Rattus norvegicus]

## Probability Based Mowse Score

Protein score is  $-10 \cdot \log(P)$ , where P is the probability that the observed match is a random event.

Protein scores greater than 61 are significant ( $p < 0.05$ ).

Protein scores are derived from ions scores as a non-probabilistic basis for ranking protein hits.

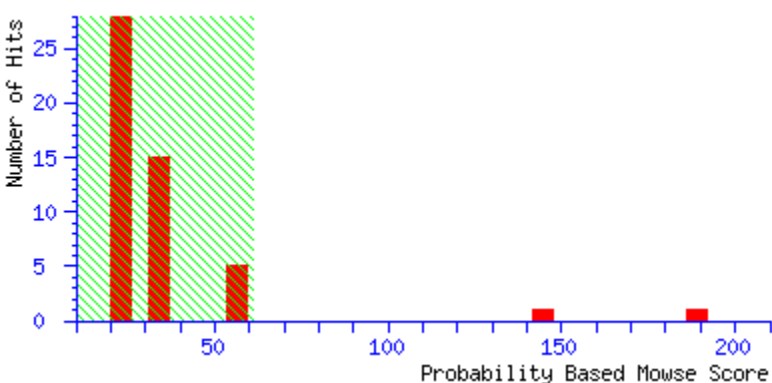

## Protein Summary Report

Format As  [Help](#)

Significance threshold  $p <$

Max. number of hits

Standard scoring  MudPIT scoring

Ions score or expect cut-off

Show sub-sets

Show pop-ups  Suppress pop-ups

Sort unassigned

Require bold red

## Index

|    | Accession                    | Mass  | Score | Description                                                                    |
|----|------------------------------|-------|-------|--------------------------------------------------------------------------------|
| 1. | <a href="#">gi 13591894</a>  | 36711 | 189   | alcohol dehydrogenase [NADP+] [Rattus norvegicus]                              |
| 2. | <a href="#">gi 149035585</a> | 33369 | 141   | aldo-keto reductase family 1, member A1, isoform CRA_b [Rattus norvegicus]     |
| 3. | <a href="#">gi 149031970</a> | 21249 | 61    | rCG50690 [Rattus norvegicus]                                                   |
| 4. | <a href="#">gi 155369696</a> | 59555 | 60    | keratin, type II cytoskeletal 6A [Rattus norvegicus]                           |
| 5. | <a href="#">gi 293348969</a> | 59675 | 59    | PREDICTED: keratin 6A-like [Rattus norvegicus]                                 |
| 6. | <a href="#">gi 554464</a>    | 3106  | 58    | keratin K6 [Rattus norvegicus]                                                 |
| 7. | <a href="#">gi 109482941</a> | 59735 | 55    | PREDICTED: keratin, type II cytoskeletal 6A-like isoform 1 [Rattus norvegicus] |

|     |                              |        |    |                                                                            |
|-----|------------------------------|--------|----|----------------------------------------------------------------------------|
| 8.  | <a href="#">gi 149020956</a> | 22738  | 36 | aldo-keto reductase family 1, member E1, isoform CRA_c [Rattus norvegicus] |
| 9.  | <a href="#">gi 149035434</a> | 18109  | 36 | rCG50190, isoform CRA_a [Rattus norvegicus]                                |
| 10. | <a href="#">gi 149035435</a> | 57721  | 36 | rCG50190, isoform CRA_b [Rattus norvegicus]                                |
| 11. | <a href="#">gi 149020954</a> | 10429  | 35 | aldo-keto reductase family 1, member E1, isoform CRA_a [Rattus norvegicus] |
| 12. | <a href="#">gi 149041538</a> | 74713  | 33 | rCG58022, isoform CRA_c [Rattus norvegicus]                                |
| 13. | <a href="#">gi 68341941</a>  | 61116  | 33 | importin subunit alpha-6 [Rattus norvegicus]                               |
| 14. | <a href="#">gi 293362285</a> | 26053  | 32 | PREDICTED: rCG56785-like [Rattus norvegicus]                               |
| 15. | <a href="#">gi 157823867</a> | 116793 | 32 | tolloid-like 1 [Rattus norvegicus]                                         |
| 16. | <a href="#">gi 149041539</a> | 58151  | 32 | rCG58022, isoform CRA_d [Rattus norvegicus]                                |
| 17. | <a href="#">gi 149058956</a> | 11702  | 32 | rCG44583 [Rattus norvegicus]                                               |
| 18. | <a href="#">gi 32492560</a>  | 106118 | 31 | Aa1017 [Rattus norvegicus]                                                 |
| 19. | <a href="#">gi 157821627</a> | 65548  | 30 | SLAIN motif-containing protein 2 [Rattus norvegicus]                       |
| 20. | <a href="#">gi 149041536</a> | 34338  | 30 | rCG58022, isoform CRA_a [Rattus norvegicus]                                |

## Results List

|                                                                                                                                                                                                                                                                                                                                                                                                                                                       |                              |                    |                   |                         |                            |            |             |             |                                    |
|-------------------------------------------------------------------------------------------------------------------------------------------------------------------------------------------------------------------------------------------------------------------------------------------------------------------------------------------------------------------------------------------------------------------------------------------------------|------------------------------|--------------------|-------------------|-------------------------|----------------------------|------------|-------------|-------------|------------------------------------|
| 1.                                                                                                                                                                                                                                                                                                                                                                                                                                                    | <a href="#">gi 13591894</a>  | <b>Mass:</b> 36711 | <b>Score:</b> 189 | <b>Expect:</b> 8.5e-015 | <b>Queries matched:</b> 19 |            |             |             |                                    |
| alcohol dehydrogenase [NADP+] [Rattus norvegicus]                                                                                                                                                                                                                                                                                                                                                                                                     |                              |                    |                   |                         |                            |            |             |             |                                    |
|                                                                                                                                                                                                                                                                                                                                                                                                                                                       | <b>Observed</b>              | <b>Mr (expt)</b>   | <b>Mr (calc)</b>  | <b>ppm</b>              | <b>Start</b>               | <b>End</b> | <b>Miss</b> | <b>Ions</b> | <b>Peptide</b>                     |
|                                                                                                                                                                                                                                                                                                                                                                                                                                                       | 897.6122                     | 896.6049           | 896.5443          | 67.6                    | 244                        | - 251      | 0           | 29          | R.SPAQILLR.W                       |
|                                                                                                                                                                                                                                                                                                                                                                                                                                                       | 897.6122                     | 896.6049           | 896.5443          | 67.6                    | 244                        | - 251      | 0           | ---         | R.SPAQILLR.W                       |
|                                                                                                                                                                                                                                                                                                                                                                                                                                                       | 928.5591                     | 927.5518           | 927.4814          | 75.9                    | 35                         | - 42       | 0           | 33          | K.YALSVGYR.H                       |
|                                                                                                                                                                                                                                                                                                                                                                                                                                                       | 928.5591                     | 927.5518           | 927.4814          | 75.9                    | 35                         | - 42       | 0           | ---         | K.YALSVGYR.H                       |
|                                                                                                                                                                                                                                                                                                                                                                                                                                                       | 1051.6309                    | 1050.6236          | 1050.5458         | 74.0                    | 158                        | - 167      | 0           | ---         | K.ALGLSNFSSR.Q                     |
|                                                                                                                                                                                                                                                                                                                                                                                                                                                       | 1051.6309                    | 1050.6236          | 1050.5458         | 74.1                    | 158                        | - 167      | 0           | ---         | K.ALGLSNFSSR.Q                     |
|                                                                                                                                                                                                                                                                                                                                                                                                                                                       | 1259.7749                    | 1258.7676          | 1258.6306         | 109                     | 288                        | - 297      | 1           | ---         | K.QLDALNKNWR.Y + 2 Deamidated (NQ) |
|                                                                                                                                                                                                                                                                                                                                                                                                                                                       | 1259.7749                    | 1258.7676          | 1258.6306         | 109                     | 288                        | - 297      | 1           | ---         | K.QLDALNKNWR.Y + 2 Deamidated (NQ) |
|                                                                                                                                                                                                                                                                                                                                                                                                                                                       | 1285.7260                    | 1284.7187          | 1284.6211         | 76.0                    | 86                         | - 96       | 0           | 54          | K.HHPEDVEPAVR.K                    |
|                                                                                                                                                                                                                                                                                                                                                                                                                                                       | 1285.7260                    | 1284.7187          | 1284.6211         | 76.0                    | 86                         | - 96       | 0           | ---         | K.HHPEDVEPAVR.K                    |
|                                                                                                                                                                                                                                                                                                                                                                                                                                                       | 1375.8502                    | 1374.8429          | 1374.7507         | 67.1                    | 69                         | - 80       | 1           | ---         | K.AVPREELFVTSK.L                   |
|                                                                                                                                                                                                                                                                                                                                                                                                                                                       | 1375.8502                    | 1374.8429          | 1374.7507         | 67.1                    | 69                         | - 80       | 1           | ---         | K.AVPREELFVTSK.L                   |
|                                                                                                                                                                                                                                                                                                                                                                                                                                                       | 1413.8215                    | 1412.8142          | 1412.7160         | 69.5                    | 86                         | - 97       | 1           | ---         | K.HHPEDVEPAVRK.T                   |
|                                                                                                                                                                                                                                                                                                                                                                                                                                                       | 1505.8356                    | 1504.8283          | 1504.6623         | 110                     | 313                        | - 325      | 0           | 29          | R.DAGHPLYPFNDPY.-                  |
|                                                                                                                                                                                                                                                                                                                                                                                                                                                       | 1505.8356                    | 1504.8283          | 1504.6623         | 110                     | 313                        | - 325      | 0           | ---         | R.DAGHPLYPFNDPY.-                  |
|                                                                                                                                                                                                                                                                                                                                                                                                                                                       | 1551.8925                    | 1550.8852          | 1550.7576         | 82.2                    | 204                        | - 218      | 0           | ---         | R.GLEVTAYSPLGSSDR.A                |
|                                                                                                                                                                                                                                                                                                                                                                                                                                                       | 1551.8925                    | 1550.8852          | 1550.7576         | 82.3                    | 204                        | - 218      | 0           | ---         | R.GLEVTAYSPLGSSDR.A                |
|                                                                                                                                                                                                                                                                                                                                                                                                                                                       | 1707.9005                    | 1706.8932          | 1706.8814         | 6.92                    | 295                        | - 308      | 1           | ---         | K.NWRYIVPMITVDGK.R + Oxidation (M) |
|                                                                                                                                                                                                                                                                                                                                                                                                                                                       | 1707.9005                    | 1706.8932          | 1706.8814         | 6.93                    | 295                        | - 308      | 1           | ---         | K.NWRYIVPMITVDGK.R + Oxidation (M) |
| <b>No match to:</b> 842.5737, 842.5737, 856.5821, 856.5821, 868.5806, 870.6026, 870.6026, 877.1173, 877.1173, 896.5347, 1179.6890, 1179.6890, 1297.7300, 1308.7545, 1308.7545, 1320.7034, 1323.7662, 1323.7662, 1331.8176, 1331.8176, 1374.7856, 1419.8638, 1419.8638, 1434.8639, 1434.8639, 1463.8888, 1463.8888, 1493.8533, 1493.8533, 1638.9702, 1638.9702, 1791.8708, 1791.8709, 1994.1136, 2050.1382, 2384.1306, 2399.1768, 2705.3350, 2717.2629 |                              |                    |                   |                         |                            |            |             |             |                                    |
| 2.                                                                                                                                                                                                                                                                                                                                                                                                                                                    | <a href="#">gi 149035585</a> | <b>Mass:</b> 33369 | <b>Score:</b> 141 | <b>Expect:</b> 5.3e-010 | <b>Queries matched:</b> 13 |            |             |             |                                    |
| aldo-keto reductase family 1, member A1, isoform CRA_b [Rattus norvegicus]                                                                                                                                                                                                                                                                                                                                                                            |                              |                    |                   |                         |                            |            |             |             |                                    |
|                                                                                                                                                                                                                                                                                                                                                                                                                                                       | <b>Observed</b>              | <b>Mr (expt)</b>   | <b>Mr (calc)</b>  | <b>ppm</b>              | <b>Start</b>               | <b>End</b> | <b>Miss</b> | <b>Ions</b> | <b>Peptide</b>                     |
|                                                                                                                                                                                                                                                                                                                                                                                                                                                       | 897.6122                     | 896.6049           | 896.5443          | 67.6                    | 244                        | - 251      | 0           | 29          | R.SPAQILLR.W                       |
|                                                                                                                                                                                                                                                                                                                                                                                                                                                       | 897.6122                     | 896.6049           | 896.5443          | 67.6                    | 244                        | - 251      | 0           | ---         | R.SPAQILLR.W                       |
|                                                                                                                                                                                                                                                                                                                                                                                                                                                       | 928.5591                     | 927.5518           | 927.4814          | 75.9                    | 35                         | - 42       | 0           | 33          | K.YALSVGYR.H                       |
|                                                                                                                                                                                                                                                                                                                                                                                                                                                       | 928.5591                     | 927.5518           | 927.4814          | 75.9                    | 35                         | - 42       | 0           | ---         | K.YALSVGYR.H                       |
|                                                                                                                                                                                                                                                                                                                                                                                                                                                       | 1051.6309                    | 1050.6236          | 1050.5458         | 74.0                    | 158                        | - 167      | 0           | ---         | K.ALGLSNFSSR.Q                     |
|                                                                                                                                                                                                                                                                                                                                                                                                                                                       | 1051.6309                    | 1050.6236          | 1050.5458         | 74.1                    | 158                        | - 167      | 0           | ---         | K.ALGLSNFSSR.Q                     |

|           |           |           |      |     |   |     |   |     |                     |
|-----------|-----------|-----------|------|-----|---|-----|---|-----|---------------------|
| 1285.7260 | 1284.7187 | 1284.6211 | 76.0 | 86  | - | 96  | 0 | 54  | K.HHPEDVEPAVR.K     |
| 1285.7260 | 1284.7187 | 1284.6211 | 76.0 | 86  | - | 96  | 0 | --- | K.HHPEDVEPAVR.K     |
| 1375.8502 | 1374.8429 | 1374.7507 | 67.1 | 69  | - | 80  | 1 | --- | K.AVPREELFVTSK.L    |
| 1375.8502 | 1374.8429 | 1374.7507 | 67.1 | 69  | - | 80  | 1 | --- | K.AVPREELFVTSK.L    |
| 1413.8215 | 1412.8142 | 1412.7160 | 69.5 | 86  | - | 97  | 1 | --- | K.HHPEDVEPAVRK.T    |
| 1551.8925 | 1550.8852 | 1550.7576 | 82.2 | 204 | - | 218 | 0 | --- | R.GLEVTAYSPLGSSDR.A |
| 1551.8925 | 1550.8852 | 1550.7576 | 82.3 | 204 | - | 218 | 0 | --- | R.GLEVTAYSPLGSSDR.A |

**No match to:** 842.5737, 842.5737, 856.5821, 856.5821, 868.5806, 870.6026, 870.6026, 877.1173, 877.1173, 896.5347, 1179.6890, 1179.6890, 1259.7749, 1259.7749, 1297.7300, 1308.7545, 1308.7545, 1320.7034, 1323.7662, 1323.7662, 1331.8176, 1331.8176, 1374.7856, 1419.8638, 1419.8638, 1434.8639, 1434.8639, 1463.8888, 1463.8888, 1493.8533, 1493.8533, 1505.8356, 1505.8356, 1638.9702, 1638.9702, 1707.9005, 1707.9005, 1791.8708, 1791.8709, 1994.1136, 2050.1382, 2384.1306, 2399.1768, 2705.3350, 2717.2629

3. [gi|149031970](#) Mass: 21249 Score: 61 Expect: 0.058 Queries matched: 6

rCG50690 [Rattus norvegicus]

| Observed  | Mr(expt)  | Mr(calc)  | ppm  | Start | End | Miss | Ions | Peptide |                 |
|-----------|-----------|-----------|------|-------|-----|------|------|---------|-----------------|
| 1179.6890 | 1178.6817 | 1178.5931 | 75.1 | 119   | -   | 128  | 0    | 51      | K.YEELQITAGR.H  |
| 1179.6890 | 1178.6817 | 1178.5931 | 75.2 | 119   | -   | 128  | 0    | ---     | K.YEELQITAGR.H  |
| 1285.7260 | 1284.7187 | 1284.6020 | 90.8 | 1     | -   | 11   | 1    | ---     | -.MQGTVEDYKSK.Y |
| 1285.7260 | 1284.7187 | 1284.6020 | 90.9 | 1     | -   | 11   | 1    | ---     | -.MQGTVEDYKSK.Y |
| 1331.8176 | 1330.8103 | 1330.6841 | 94.9 | 135   | -   | 145  | 1    | ---     | R.NTKQEISEINR.M |
| 1331.8176 | 1330.8104 | 1330.6841 | 94.9 | 135   | -   | 145  | 1    | ---     | R.NTKQEISEINR.M |

**No match to:** 842.5737, 842.5737, 856.5821, 856.5821, 868.5806, 870.6026, 870.6026, 877.1173, 877.1173, 896.5347, 897.6122, 897.6122, 928.5591, 928.5591, 1051.6309, 1051.6309, 1259.7749, 1259.7749, 1297.7300, 1308.7545, 1308.7545, 1320.7034, 1323.7662, 1323.7662, 1374.7856, 1375.8502, 1375.8502, 1413.8215, 1419.8638, 1419.8638, 1434.8639, 1434.8639, 1463.8888, 1463.8888, 1493.8533, 1493.8533, 1505.8356, 1505.8356, 1551.8925, 1551.8925, 1638.9702, 1638.9702, 1707.9005, 1707.9005, 1791.8708, 1791.8709, 1994.1136, 2050.1382, 2384.1306, 2399.1768, 2705.3350, 2717.2629

4. [gi|155369696](#) Mass: 59555 Score: 60 Expect: 0.063 Queries matched: 11

keratin, type II cytoskeletal 6A [Rattus norvegicus]

| Observed  | Mr(expt)  | Mr(calc)  | ppm    | Start | End | Miss | Ions | Peptide |                                    |
|-----------|-----------|-----------|--------|-------|-----|------|------|---------|------------------------------------|
| 1051.6309 | 1050.6236 | 1050.4764 | 140    | 58    | -   | 67   | 0    | ---     | R.SLCGVGSSQR.I + Deamidated (NQ)   |
| 1051.6309 | 1050.6236 | 1050.4764 | 140    | 58    | -   | 67   | 0    | ---     | R.SLCGVGSSQR.I + Deamidated (NQ)   |
| 1179.6890 | 1178.6817 | 1178.5931 | 75.1   | 349   | -   | 358  | 0    | 51      | K.YEELQITAGR.H                     |
| 1179.6890 | 1178.6817 | 1178.5931 | 75.2   | 349   | -   | 358  | 0    | ---     | K.YEELQITAGR.H                     |
| 1331.8176 | 1330.8103 | 1330.6841 | 94.9   | 365   | -   | 375  | 1    | ---     | R.NTKQEISEINR.M                    |
| 1331.8176 | 1330.8104 | 1330.6841 | 94.9   | 365   | -   | 375  | 1    | ---     | R.NTKQEISEINR.M                    |
| 1463.8888 | 1462.8815 | 1462.7667 | 78.5   | 172   | -   | 183  | 1    | ---     | R.FLEQQNKVLDTK.W + Deamidated (NQ) |
| 1463.8888 | 1462.8815 | 1462.7667 | 78.5   | 172   | -   | 183  | 1    | ---     | R.FLEQQNKVLDTK.W + Deamidated (NQ) |
| 1493.8533 | 1492.8460 | 1492.7959 | 33.5   | 433   | -   | 444  | 1    | ---     | R.LLKEYQDLMNVK.L                   |
| 1493.8533 | 1492.8460 | 1492.7959 | 33.6   | 433   | -   | 444  | 1    | ---     | R.LLKEYQDLMNVK.L                   |
| 2384.1306 | 2383.1233 | 2383.2093 | -36.08 | 436   | -   | 455  | 1    | ---     | K.EYQDLMNVKALDVEIATYR.T            |

**No match to:** 842.5737, 842.5737, 856.5821, 856.5821, 868.5806, 870.6026, 870.6026, 877.1173, 877.1173, 896.5347, 897.6122, 897.6122, 928.5591, 928.5591, 1259.7749, 1259.7749, 1285.7260, 1285.7260, 1297.7300, 1308.7545, 1308.7545, 1320.7034, 1323.7662, 1323.7662, 1374.7856, 1375.8502, 1375.8502, 1413.8215, 1419.8638, 1419.8638, 1434.8639, 1434.8639, 1505.8356, 1505.8356, 1551.8925, 1551.8925, 1638.9702, 1638.9702, 1707.9005, 1707.9005, 1791.8708, 1791.8709, 1994.1136, 2050.1382, 2399.1768, 2705.3350, 2717.2629

5. [gi|293348969](#) Mass: 59675 Score: 59 Expect: 0.088 Queries matched: 10

PREDICTED: keratin 6A-like [Rattus norvegicus]

| Observed  | Mr (expt) | Mr (calc) | ppm    | Start | End   | Miss | Ions | Peptide                           |
|-----------|-----------|-----------|--------|-------|-------|------|------|-----------------------------------|
| 1179.6890 | 1178.6817 | 1178.5931 | 75.1   | 349   | - 358 | 0    | 51   | K.YEELQITAGR.H                    |
| 1179.6890 | 1178.6817 | 1178.5931 | 75.2   | 349   | - 358 | 0    | ---  | K.YEELQITAGR.H                    |
| 1331.8176 | 1330.8103 | 1330.6841 | 94.9   | 365   | - 375 | 1    | ---  | R.NTKQEISEINR.M                   |
| 1331.8176 | 1330.8104 | 1330.6841 | 94.9   | 365   | - 375 | 1    | ---  | R.NTKQEISEINR.M                   |
| 1463.8888 | 1462.8815 | 1462.7667 | 78.5   | 172   | - 183 | 1    | ---  | R.FLEQQNKVLDTK.W + Deamidated (NQ |
| 1463.8888 | 1462.8815 | 1462.7667 | 78.5   | 172   | - 183 | 1    | ---  | R.FLEQQNKVLDTK.W + Deamidated (NQ |
| 1493.8533 | 1492.8460 | 1492.7959 | 33.5   | 433   | - 444 | 1    | ---  | R.LLKEYQDLMNVK.L                  |
| 1493.8533 | 1492.8460 | 1492.7959 | 33.6   | 433   | - 444 | 1    | ---  | R.LLKEYQDLMNVK.L                  |
| 2050.1382 | 2049.1309 | 2049.0166 | 55.8   | 197   | - 212 | 1    | ---  | R.QNLEPLFEQYINNLRR.Q + 3 Deamidat |
| 2384.1306 | 2383.1233 | 2383.2093 | -36.08 | 436   | - 455 | 1    | ---  | K.EYQDLMNVKLALDVEIATYR.T          |

**No match to:** 842.5737, 842.5737, 856.5821, 856.5821, 868.5806, 870.6026, 870.6026, 877.1173, 877.1173, 896.5347, 897.6122, 897.6122, 928.5591, 928.5591, 1051.6309, 1051.6309, 1259.7749, 1259.7749, 1285.7260, 1285.7260, 1297.7300, 1308.7545, 1308.7545, 1320.7034, 1323.7662, 1323.7662, 1374.7856, 1375.8502, 1375.8502, 1413.8215, 1419.8638, 1419.8638, 1434.8639, 1434.8639, 1505.8356, 1505.8356, 1551.8925, 1551.8925, 1638.9702, 1638.9702, 1707.9005, 1707.9005, 1791.8708, 1791.8709, 1994.1136, 2399.1768, 2705.3350, 2717.2629

6. [gi|554464](#) Mass: 3106 Score: 58 Expect: 0.11 Queries matched: 2

keratin K6 [Rattus norvegicus]

| Observed  | Mr (expt) | Mr (calc) | ppm  | Start | End  | Miss | Ions | Peptide        |
|-----------|-----------|-----------|------|-------|------|------|------|----------------|
| 1179.6890 | 1178.6817 | 1178.5931 | 75.1 | 5     | - 14 | 0    | 51   | K.YEELQITAGR.H |
| 1179.6890 | 1178.6817 | 1178.5931 | 75.2 | 5     | - 14 | 0    | ---  | K.YEELQITAGR.H |

**No match to:** 842.5737, 842.5737, 856.5821, 856.5821, 868.5806, 870.6026, 870.6026, 877.1173, 877.1173, 896.5347, 897.6122, 897.6122, 928.5591, 928.5591, 1051.6309, 1051.6309, 1259.7749, 1259.7749, 1285.7260, 1285.7260, 1297.7300, 1308.7545, 1308.7545, 1320.7034, 1323.7662, 1323.7662, 1331.8176, 1331.8176, 1374.7856, 1375.8502, 1375.8502, 1413.8215, 1419.8638, 1419.8638, 1434.8639, 1434.8639, 1463.8888, 1463.8888, 1493.8533, 1493.8533, 1505.8356, 1505.8356, 1551.8925, 1551.8925, 1638.9702, 1638.9702, 1707.9005, 1707.9005, 1791.8708, 1791.8709, 1994.1136, 2050.1382, 2384.1306, 2399.1768, 2705.3350, 2717.2629

7. [gi|109482941](#) Mass: 59735 Score: 55 Expect: 0.2 Queries matched: 12

PREDICTED: keratin, type II cytoskeletal 6A-like isoform 1 [Rattus norvegicus]

| Observed  | Mr (expt) | Mr (calc) | ppm    | Start | End   | Miss | Ions | Peptide                           |
|-----------|-----------|-----------|--------|-------|-------|------|------|-----------------------------------|
| 1179.6890 | 1178.6817 | 1178.5931 | 75.1   | 349   | - 358 | 0    | 51   | K.YEELQITAGR.H                    |
| 1179.6890 | 1178.6817 | 1178.5931 | 75.2   | 349   | - 358 | 0    | ---  | K.YEELQITAGR.H                    |
| 1331.8176 | 1330.8103 | 1330.6841 | 94.9   | 365   | - 375 | 1    | ---  | R.NTKQEISEINR.M                   |
| 1331.8176 | 1330.8104 | 1330.6841 | 94.9   | 365   | - 375 | 1    | ---  | R.NTKQEISEINR.M                   |
| 1463.8888 | 1462.8815 | 1462.7667 | 78.5   | 172   | - 183 | 1    | ---  | R.FLEQQNKVLDTK.W + Deamidated (NQ |
| 1463.8888 | 1462.8815 | 1462.7667 | 78.5   | 172   | - 183 | 1    | ---  | R.FLEQQNKVLDTK.W + Deamidated (NQ |
| 1493.8533 | 1492.8460 | 1492.7959 | 33.5   | 433   | - 444 | 1    | ---  | R.LLKEYQDLMNVK.L                  |
| 1493.8533 | 1492.8460 | 1492.7959 | 33.6   | 433   | - 444 | 1    | ---  | R.LLKEYQDLMNVK.L                  |
| 1551.8925 | 1550.8852 | 1550.7763 | 70.2   | 289   | - 301 | 0    | ---  | R.VIFEAEALSQMQR.I                 |
| 1551.8925 | 1550.8852 | 1550.7763 | 70.3   | 289   | - 301 | 0    | ---  | R.VIFEAEALSQMQR.I                 |
| 1994.1136 | 1993.1063 | 1993.0381 | 34.2   | 197   | - 212 | 1    | ---  | R.QGLETLFQYINNLRR.Q               |
| 2384.1306 | 2383.1233 | 2383.2093 | -36.08 | 436   | - 455 | 1    | ---  | K.EYQDLMNVKLALDVEIATYR.T          |

**No match to:** 842.5737, 842.5737, 856.5821, 856.5821, 868.5806, 870.6026, 870.6026, 877.1173, 877.1173, 896.5347, 897.6122, 897.6122, 928.5591, 928.5591, 1051.6309, 1051.6309, 1259.7749, 1259.7749, 1285.7260, 1285.7260, 1297.7300, 1308.7545, 1308.7545, 1320.7034, 1323.7662, 1323.7662, 1374.7856, 1375.8502, 1375.8502, 1413.8215, 1419.8638, 1419.8638, 1434.8639, 1434.8639, 1505.8356, 1505.8356, 1638.9702, 1638.9702, 1707.9005, 1707.9005, 1791.8708, 1791.8709, 2050.1382, 2399.1768, 2705.3350, 2717.2629

8. [gi|149020956](#) Mass: 22738 Score: 36 Expect: 15 Queries matched: 4  
aldo-keto reductase family 1, member E1, isoform CRA\_c [Rattus norvegicus]
- | Observed | Mr(expt) | Mr(calc) | ppm  | Start | End   | Miss | Ions | Peptide      |
|----------|----------|----------|------|-------|-------|------|------|--------------|
| 897.6122 | 896.6049 | 896.5443 | 67.6 | 125   | - 132 | 0    | 29   | K.SPAQILIR.F |
| 897.6122 | 896.6049 | 896.5443 | 67.6 | 125   | - 132 | 0    | ---  | K.SPAQILIR.F |
| 928.5591 | 927.5518 | 927.5250 | 28.9 | 145   | - 152 | 1    | ---  | K.SVNPSRIR.E |
| 928.5591 | 927.5518 | 927.5250 | 28.9 | 145   | - 152 | 1    | ---  | K.SVNPSRIR.E |
- No match to: 842.5737, 842.5737, 856.5821, 856.5821, 868.5806, 870.6026, 870.6026, 877.1173, 877.1173, 896.5347, 1051.6309, 1051.6309, 1179.6890, 1179.6890, 1259.7749, 1259.7749, 1285.7260, 1285.7260, 1297.7300, 1308.7545, 1308.7545, 1320.7034, 1323.7662, 1323.7662, 1331.8176, 1331.8176, 1374.7856, 1375.8502, 1375.8502, 1413.8215, 1419.8638, 1419.8638, 1434.8639, 1434.8639, 1463.8888, 1463.8888, 1493.8533, 1493.8533, 1505.8356, 1505.8356, 1551.8925, 1551.8925, 1638.9702, 1638.9702, 1707.9005, 1707.9005, 1791.8708, 1791.8709, 1994.1136, 2050.1382, 2384.1306, 2399.1768, 2705.3350, 2717.2629
9. [gi|149035434](#) Mass: 18109 Score: 36 Expect: 18 Queries matched: 6  
rCG50190, isoform CRA\_a [Rattus norvegicus]
- | Observed  | Mr(expt)  | Mr(calc)  | ppm  | Start | End   | Miss | Ions | Peptide                            |
|-----------|-----------|-----------|------|-------|-------|------|------|------------------------------------|
| 842.5737  | 841.5664  | 841.4657  | 120  | 71    | - 77  | 0    | ---  | K.EIQSLPR.A                        |
| 842.5737  | 841.5665  | 841.4657  | 120  | 71    | - 77  | 0    | 26   | K.EIQSLPR.A                        |
| 1259.7749 | 1258.7676 | 1258.6768 | 72.1 | 94    | - 104 | 1    | ---  | R.ENSELEAKVLK.F                    |
| 1259.7749 | 1258.7676 | 1258.6768 | 72.1 | 94    | - 104 | 1    | ---  | R.ENSELEAKVLK.F                    |
| 1493.8533 | 1492.8460 | 1492.7885 | 38.5 | 37    | - 49  | 1    | ---  | K.RQQLTSAFTAIQK.S + 2 Deamidated ( |
| 1493.8533 | 1492.8460 | 1492.8038 | 28.3 | 82    | - 93  | 0    | ---  | R.EQFLVAYNLLQR.E                   |
- No match to: 856.5821, 856.5821, 868.5806, 870.6026, 870.6026, 877.1173, 877.1173, 896.5347, 897.6122, 897.6122, 928.5591, 928.5591, 1051.6309, 1051.6309, 1179.6890, 1179.6890, 1285.7260, 1285.7260, 1297.7300, 1308.7545, 1308.7545, 1320.7034, 1323.7662, 1323.7662, 1331.8176, 1331.8176, 1374.7856, 1375.8502, 1375.8502, 1413.8215, 1419.8638, 1419.8638, 1434.8639, 1434.8639, 1463.8888, 1463.8888, 1505.8356, 1505.8356, 1551.8925, 1551.8925, 1638.9702, 1638.9702, 1707.9005, 1707.9005, 1791.8708, 1791.8709, 1994.1136, 2050.1382, 2384.1306, 2399.1768, 2705.3350, 2717.2629
10. [gi|149035435](#) Mass: 57721 Score: 36 Expect: 18 Queries matched: 8  
rCG50190, isoform CRA\_b [Rattus norvegicus]
- | Observed  | Mr(expt)  | Mr(calc)  | ppm  | Start | End   | Miss | Ions | Peptide                            |
|-----------|-----------|-----------|------|-------|-------|------|------|------------------------------------|
| 842.5737  | 841.5664  | 841.4657  | 120  | 71    | - 77  | 0    | ---  | K.EIQSLPR.A                        |
| 842.5737  | 841.5665  | 841.4657  | 120  | 71    | - 77  | 0    | 26   | K.EIQSLPR.A                        |
| 1259.7749 | 1258.7676 | 1258.6768 | 72.1 | 94    | - 104 | 1    | ---  | R.ENSELEAKVLK.F                    |
| 1259.7749 | 1258.7676 | 1258.6768 | 72.1 | 94    | - 104 | 1    | ---  | R.ENSELEAKVLK.F                    |
| 1285.7260 | 1284.7187 | 1284.6786 | 31.2 | 292   | - 302 | 1    | ---  | K.QAQEKLLDNAR.M                    |
| 1285.7260 | 1284.7187 | 1284.6786 | 31.3 | 292   | - 302 | 1    | ---  | K.QAQEKLLDNAR.M                    |
| 1493.8533 | 1492.8460 | 1492.7885 | 38.5 | 37    | - 49  | 1    | ---  | K.RQQLTSAFTAIQK.S + 2 Deamidated ( |
| 1493.8533 | 1492.8460 | 1492.8038 | 28.3 | 82    | - 93  | 0    | ---  | R.EQFLVAYNLLQR.E                   |
- No match to: 856.5821, 856.5821, 868.5806, 870.6026, 870.6026, 877.1173, 877.1173, 896.5347, 897.6122, 897.6122, 928.5591, 928.5591, 1051.6309, 1051.6309, 1179.6890, 1179.6890, 1297.7300, 1308.7545, 1308.7545, 1320.7034, 1323.7662, 1323.7662, 1331.8176, 1331.8176, 1374.7856, 1375.8502, 1375.8502, 1413.8215, 1419.8638, 1419.8638, 1434.8639, 1434.8639, 1463.8888, 1463.8888, 1505.8356, 1505.8356, 1551.8925, 1551.8925, 1638.9702, 1638.9702, 1707.9005, 1707.9005, 1791.8708, 1791.8709, 1994.1136, 2050.1382, 2384.1306, 2399.1768, 2705.3350, 2717.2629
11. [gi|149020954](#) Mass: 10429 Score: 35 Expect: 21 Queries matched: 4  
aldo-keto reductase family 1, member E1, isoform CRA\_a [Rattus norvegicus]
- | Observed | Mr(expt) | Mr(calc) | ppm | Start | End | Miss | Ions | Peptide |
|----------|----------|----------|-----|-------|-----|------|------|---------|
|----------|----------|----------|-----|-------|-----|------|------|---------|

897.6122 896.6049 896.5443 67.6 16 - 23 0 29 K.SPAQILIR.F  
 897.6122 896.6049 896.5443 67.6 16 - 23 0 --- K.SPAQILIR.F  
 928.5591 927.5518 927.5250 28.9 36 - 43 1 --- K.SVNPSRIR.E  
 928.5591 927.5518 927.5250 28.9 36 - 43 1 --- K.SVNPSRIR.E  
**No match to:** 842.5737, 842.5737, 856.5821, 856.5821, 868.5806, 870.6026, 870.6026, 877.1173, 877.1173, 896.5347, 1051.6309, 1051.6309, 1179.6890, 1179.6890, 1259.7749, 1259.7749, 1285.7260, 1285.7260, 1297.7300, 1308.7545, 1308.7545, 1320.7034, 1323.7662, 1323.7662, 1331.8176, 1331.8176, 1374.7856, 1375.8502, 1375.8502, 1413.8215, 1419.8638, 1419.8638, 1434.8639, 1434.8639, 1463.8888, 1463.8888, 1493.8533, 1493.8533, 1505.8356, 1505.8356, 1551.8925, 1551.8925, 1638.9702, 1638.9702, 1707.9005, 1707.9005, 1791.8708, 1791.8709, 1994.1136, 2050.1382, 2384.1306, 2399.1768, 2705.3350, 2717.2629

12. [gi|149041538](#) Mass: 74713 Score: 33 Expect: 36 Queries matched: 10

rCG58022, isoform CRA\_c [Rattus norvegicus]

| Observed  | Mr(expt)  | Mr(calc)  | ppm  | Start | End | Miss | Ions | Peptide                              |
|-----------|-----------|-----------|------|-------|-----|------|------|--------------------------------------|
| 842.5737  | 841.5664  | 841.5637  | 3.28 | 360   | 366 | 1    | ---  | R.KELLVLK.L                          |
| 842.5737  | 841.5665  | 841.5637  | 3.32 | 360   | 366 | 1    | ---  | R.KELLVLK.L                          |
| 1179.6890 | 1178.6817 | 1178.5931 | 75.1 | 240   | 248 | 1    | 24   | R.YQEVLDKQR.Q + Deamidated (NQ)      |
| 1179.6890 | 1178.6817 | 1178.5931 | 75.2 | 240   | 248 | 1    | ---  | R.YQEVLDKQR.Q + Deamidated (NQ)      |
| 1323.7662 | 1322.7589 | 1322.5772 | 137  | 143   | 153 | 1    | ---  | K.QLASRNCSEEEK.C + 2 Deamidated (NQ) |
| 1323.7662 | 1322.7590 | 1322.5772 | 137  | 143   | 153 | 1    | ---  | K.QLASRNCSEEEK.C + 2 Deamidated (NQ) |
| 1413.8215 | 1412.8142 | 1412.8126 | 1.16 | 361   | 372 | 1    | ---  | K.ELLVLKLEEAKE.E                     |
| 1463.8888 | 1462.8815 | 1462.7126 | 115  | 321   | 331 | 1    | ---  | R.EVWEMELDRLK.N + Oxidation (M)      |
| 1463.8888 | 1462.8815 | 1462.7126 | 115  | 321   | 331 | 1    | ---  | R.EVWEMELDRLK.N + Oxidation (M)      |
| 1994.1136 | 1993.1063 | 1992.8946 | 106  | 46    | 63  | 0    | ---  | K.NLSPPSVSSQMITESNR.N + 2 Deamida    |

**No match to:** 856.5821, 856.5821, 868.5806, 870.6026, 870.6026, 877.1173, 877.1173, 896.5347, 897.6122, 897.6122, 928.5591, 928.5591, 1051.6309, 1051.6309, 1259.7749, 1259.7749, 1285.7260, 1285.7260, 1297.7300, 1308.7545, 1308.7545, 1320.7034, 1331.8176, 1331.8176, 1374.7856, 1375.8502, 1375.8502, 1419.8638, 1419.8638, 1434.8639, 1434.8639, 1493.8533, 1493.8533, 1505.8356, 1505.8356, 1551.8925, 1551.8925, 1638.9702, 1638.9702, 1707.9005, 1707.9005, 1791.8708, 1791.8709, 2050.1382, 2384.1306, 2399.1768, 2705.3350, 2717.2629

13. [gi|68341941](#) Mass: 61116 Score: 33 Expect: 37 Queries matched: 8

importin subunit alpha-6 [Rattus norvegicus]

| Observed  | Mr(expt)  | Mr(calc)  | ppm    | Start | End | Miss | Ions | Peptide                           |
|-----------|-----------|-----------|--------|-------|-----|------|------|-----------------------------------|
| 842.5737  | 841.5664  | 841.4770  | 106    | 48    | 54  | 1    | ---  | R.RNVSLPR.N + Deamidated (NQ)     |
| 842.5737  | 841.5665  | 841.4770  | 106    | 48    | 54  | 1    | 34   | R.RNVSLPR.N + Deamidated (NQ)     |
| 1374.7856 | 1373.7783 | 1373.7013 | 56.1   | 299   | 309 | 0    | ---  | R.LVELLMHNDYK.V                   |
| 1375.8502 | 1374.8429 | 1374.6853 | 115    | 299   | 309 | 0    | ---  | R.LVELLMHNDYK.V + Deamidated (NQ) |
| 1375.8502 | 1374.8429 | 1374.6853 | 115    | 299   | 309 | 0    | ---  | R.LVELLMHNDYK.V + Deamidated (NQ) |
| 1413.8215 | 1412.8142 | 1412.8391 | -17.64 | 162   | 174 | 0    | ---  | K.VVIETGAVPIFIR.L                 |
| 1551.8925 | 1550.8852 | 1550.9144 | -18.84 | 437   | 450 | 0    | ---  | K.IVQVALNGLENILR.L                |
| 1551.8925 | 1550.8852 | 1550.9144 | -18.81 | 437   | 450 | 0    | ---  | K.IVQVALNGLENILR.L                |

**No match to:** 856.5821, 856.5821, 868.5806, 870.6026, 870.6026, 877.1173, 877.1173, 896.5347, 897.6122, 897.6122, 928.5591, 928.5591, 1051.6309, 1051.6309, 1179.6890, 1179.6890, 1259.7749, 1259.7749, 1285.7260, 1285.7260, 1297.7300, 1308.7545, 1308.7545, 1320.7034, 1323.7662, 1323.7662, 1331.8176, 1331.8176, 1419.8638, 1419.8638, 1434.8639, 1434.8639, 1463.8888, 1463.8888, 1493.8533, 1493.8533, 1505.8356, 1505.8356, 1638.9702, 1638.9702, 1707.9005, 1707.9005, 1791.8708, 1791.8709, 1994.1136, 2050.1382, 2384.1306, 2399.1768, 2705.3350, 2717.2629

14. [gi|293362285](#) Mass: 26053 Score: 32 Expect: 40 Queries matched: 7

PREDICTED: rCG56785-like [Rattus norvegicus]

| Observed | Mr(expt) | Mr(calc) | ppm | Start | End | Miss | Ions | Peptide |
|----------|----------|----------|-----|-------|-----|------|------|---------|
|----------|----------|----------|-----|-------|-----|------|------|---------|

|           |           |           |      |    |   |    |   |     |                                    |
|-----------|-----------|-----------|------|----|---|----|---|-----|------------------------------------|
| 1259.7749 | 1258.7676 | 1258.6517 | 92.1 | 73 | - | 82 | 1 | --- | K.LITEERNDLR.D + Deamidated (NQ)   |
| 1259.7749 | 1258.7676 | 1258.6517 | 92.1 | 73 | - | 82 | 1 | --- | K.LITEERNDLR.D + Deamidated (NQ)   |
| 1308.7545 | 1307.7472 | 1307.6081 | 106  | 36 | - | 46 | 0 | --- | R.QQFWGMLNAGR.E + Deamidated (NQ)  |
| 1308.7545 | 1307.7472 | 1307.6081 | 106  | 36 | - | 46 | 0 | 25  | R.QQFWGMLNAGR.E + Deamidated (NQ)  |
| 1323.7662 | 1322.7589 | 1322.6190 | 106  | 36 | - | 46 | 0 | --- | R.QQFWGMLNAGR.E + Oxidation (M)    |
| 1323.7662 | 1322.7590 | 1322.6190 | 106  | 36 | - | 46 | 0 | --- | R.QQFWGMLNAGR.E + Oxidation (M)    |
| 2705.3350 | 2704.3277 | 2704.1194 | 77.0 | 23 | - | 46 | 1 | --- | K.ESSLSSQSNDGQRQQFWGMLNAGR.E + 6 D |

**No match to:** 842.5737, 842.5737, 856.5821, 856.5821, 868.5806, 870.6026, 870.6026, 877.1173, 877.1173, 896.5347, 897.6122, 897.6122, 928.5591, 928.5591, 1051.6309, 1051.6309, 1179.6890, 1179.6890, 1285.7260, 1285.7260, 1297.7300, 1320.7034, 1331.8176, 1331.8176, 1374.7856, 1375.8502, 1375.8502, 1413.8215, 1419.8638, 1419.8638, 1434.8639, 1434.8639, 1463.8888, 1463.8888, 1493.8533, 1493.8533, 1505.8356, 1505.8356, 1551.8925, 1551.8925, 1638.9702, 1638.9702, 1707.9005, 1707.9005, 1791.8708, 1791.8709, 1994.1136, 2050.1382, 2384.1306, 2399.1768, 2717.2629

15. [gi|157823867](#) Mass: 116793 Score: 32 Expect: 40 Queries matched: 17

tolloid-like 1 [Rattus norvegicus]

| Observed  | Mr (expt) | Mr (calc) | ppm  | Start | End | Miss | Ions | Peptide |                                    |
|-----------|-----------|-----------|------|-------|-----|------|------|---------|------------------------------------|
| 842.5737  | 841.5664  | 841.4657  | 120  | 2     | -   | 9    | 0    | ---     | M.GLQALSPR.M + Deamidated (NQ)     |
| 842.5737  | 841.5665  | 841.4657  | 120  | 2     | -   | 9    | 0    | 21      | M.GLQALSPR.M + Deamidated (NQ)     |
| 897.6122  | 896.6049  | 896.4214  | 205  | 439   | -   | 444  | 0    | ---     | R.MWIEFR.S + Oxidation (M)         |
| 897.6122  | 896.6049  | 896.4214  | 205  | 439   | -   | 444  | 0    | ---     | R.MWIEFR.S + Oxidation (M)         |
| 1259.7749 | 1258.7676 | 1258.5789 | 150  | 524   | -   | 535  | 0    | ---     | R.DGNSENSPLIGR.F + Deamidated (NQ) |
| 1259.7749 | 1258.7676 | 1258.5789 | 150  | 524   | -   | 535  | 0    | ---     | R.DGNSENSPLIGR.F + Deamidated (NQ) |
| 1285.7260 | 1284.7187 | 1284.6714 | 36.8 | 625   | -   | 636  | 0    | ---     | K.LNGTITTPGWPK.E + Deamidated (NQ) |
| 1285.7260 | 1284.7187 | 1284.6714 | 36.8 | 625   | -   | 636  | 0    | ---     | K.LNGTITTPGWPK.E + Deamidated (NQ) |
| 1419.8638 | 1418.8565 | 1418.7001 | 110  | 117   | -   | 129  | 1    | ---     | R.RIGSGLEQNNTTK.G + 2 Deamidated   |
| 1419.8638 | 1418.8565 | 1418.7001 | 110  | 117   | -   | 129  | 1    | ---     | R.RIGSGLEQNNTTK.G + 2 Deamidated   |
| 1434.8639 | 1433.8566 | 1433.5551 | 210  | 767   | -   | 777  | 1    | ---     | K.HDCKEAECEQK.I + Deamidated (NQ)  |
| 1434.8639 | 1433.8566 | 1433.5551 | 210  | 767   | -   | 777  | 1    | ---     | K.HDCKEAECEQK.I + Deamidated (NQ)  |
| 1463.8888 | 1462.8815 | 1462.6510 | 158  | 1002  | -   | 1013 | 1    | ---     | K.SIRYPETMHAEN.- + Oxidation (M)   |
| 1463.8888 | 1462.8815 | 1462.6510 | 158  | 1002  | -   | 1013 | 1    | ---     | K.SIRYPETMHAEN.- + Oxidation (M)   |
| 2050.1382 | 2049.1309 | 2049.0353 | 46.7 | 643   | -   | 659  | 1    | ---     | K.NCVWQVIAPSQYRISVK.F + 2 Deamida  |
| 2705.3350 | 2704.3277 | 2704.1356 | 71.0 | 197   | -   | 218  | 0    | ---     | R.SDEESYIVFTYRPGCCSYVGR.R          |
| 2717.2629 | 2716.2556 | 2716.1897 | 24.3 | 279   | -   | 301  | 1    | ---     | K.MEPGEVNSLGERYDFDSIMHYAR.N + Dea  |

**No match to:** 856.5821, 856.5821, 868.5806, 870.6026, 870.6026, 877.1173, 877.1173, 896.5347, 928.5591, 928.5591, 1051.6309, 1051.6309, 1179.6890, 1179.6890, 1297.7300, 1308.7545, 1308.7545, 1320.7034, 1323.7662, 1323.7662, 1331.8176, 1331.8176, 1374.7856, 1375.8502, 1375.8502, 1413.8215, 1493.8533, 1493.8533, 1505.8356, 1505.8356, 1551.8925, 1551.8925, 1638.9702, 1638.9702, 1707.9005, 1707.9005, 1791.8708, 1791.8709, 1994.1136, 2384.1306, 2399.1768

16. [gi|149041539](#) Mass: 58151 Score: 32 Expect: 40 Queries matched: 7

rCG58022, isoform CRA\_d [Rattus norvegicus]

| Observed  | Mr (expt) | Mr (calc) | ppm  | Start | End | Miss | Ions | Peptide |                                 |
|-----------|-----------|-----------|------|-------|-----|------|------|---------|---------------------------------|
| 842.5737  | 841.5664  | 841.5637  | 3.28 | 205   | -   | 211  | 1    | ---     | R.KELLVLK.L                     |
| 842.5737  | 841.5665  | 841.5637  | 3.32 | 205   | -   | 211  | 1    | ---     | R.KELLVLK.L                     |
| 1179.6890 | 1178.6817 | 1178.5931 | 75.1 | 85    | -   | 93   | 1    | 24      | R.YQEVLDKQR.Q + Deamidated (NQ) |
| 1179.6890 | 1178.6817 | 1178.5931 | 75.2 | 85    | -   | 93   | 1    | ---     | R.YQEVLDKQR.Q + Deamidated (NQ) |
| 1413.8215 | 1412.8142 | 1412.8126 | 1.16 | 206   | -   | 217  | 1    | ---     | K.ELLVLKLEEAKE.E                |
| 1463.8888 | 1462.8815 | 1462.7126 | 115  | 166   | -   | 176  | 1    | ---     | R.EVWEMELDRK.N + Oxidation (M)  |
| 1463.8888 | 1462.8815 | 1462.7126 | 115  | 166   | -   | 176  | 1    | ---     | R.EVWEMELDRK.N + Oxidation (M)  |

**No match to:** 856.5821, 856.5821, 868.5806, 870.6026, 870.6026, 877.1173, 877.1173, 896.5347,



897.6122, 897.6122, 928.5591, 928.5591, 1051.6309, 1051.6309, 1259.7749, 1259.7749, 1285.7260, 1285.7260, 1297.7300, 1308.7545, 1308.7545, 1320.7034, 1323.7662, 1323.7662, 1331.8176, 1331.8176, 1374.7856, 1375.8502, 1375.8502, 1419.8638, 1419.8638, 1434.8639, 1434.8639, 1493.8533, 1493.8533, 1505.8356, 1505.8356, 1551.8925, 1551.8925, 1638.9702, 1638.9702, 1707.9005, 1707.9005, 1791.8708, 1791.8709, 1994.1136, 2050.1382, 2384.1306, 2399.1768, 2705.3350, 2717.2629

17. [gi|149058956](#) Mass: 11702 Score: 32 Expect: 43 Queries matched: 7

rCG44583 [Rattus norvegicus]

| Observed  | Mr (expt) | Mr (calc) | ppm  | Start | End | Miss | Ions | Peptide |                                    |
|-----------|-----------|-----------|------|-------|-----|------|------|---------|------------------------------------|
| 897.6122  | 896.6049  | 896.4942  | 123  | 1     | -   | 7    | 0    | ---     | -.MALFFLR.G                        |
| 897.6122  | 896.6049  | 896.4942  | 123  | 1     | -   | 7    | 0    | ---     | -.MALFFLR.G                        |
| 1179.6890 | 1178.6817 | 1178.5567 | 106  | 20    | -   | 28   | 0    | ---     | R.QELNYLENR.K + Deamidated (NQ)    |
| 1179.6890 | 1178.6817 | 1178.5567 | 106  | 20    | -   | 28   | 0    | ---     | R.QELNYLENR.K + Deamidated (NQ)    |
| 1308.7545 | 1307.7472 | 1307.6357 | 85.3 | 20    | -   | 29   | 1    | ---     | R.QELNYLENRK.T + 2 Deamidated (NQ) |
| 1308.7545 | 1307.7472 | 1307.6357 | 85.3 | 20    | -   | 29   | 1    | 15      | R.QELNYLENRK.T + 2 Deamidated (NQ) |
| 1994.1136 | 1993.1063 | 1993.0713 | 17.6 | 42    | -   | 56   | 1    | ---     | K.WDFLKWLLNLFIEEK.I                |

No match to: 842.5737, 842.5737, 856.5821, 856.5821, 868.5806, 870.6026, 870.6026, 877.1173, 877.1173, 896.5347, 928.5591, 928.5591, 1051.6309, 1051.6309, 1259.7749, 1259.7749, 1285.7260, 1285.7260, 1297.7300, 1320.7034, 1323.7662, 1323.7662, 1331.8176, 1331.8176, 1374.7856, 1375.8502, 1375.8502, 1413.8215, 1419.8638, 1419.8638, 1434.8639, 1434.8639, 1463.8888, 1463.8888, 1493.8533, 1493.8533, 1505.8356, 1505.8356, 1551.8925, 1551.8925, 1638.9702, 1638.9702, 1707.9005, 1707.9005, 1791.8708, 1791.8709, 2050.1382, 2384.1306, 2399.1768, 2705.3350, 2717.2629

18. [gi|32492560](#) Mass: 106118 Score: 31 Expect: 58 Queries matched: 16

Aa1017 [Rattus norvegicus]

| Observed  | Mr (expt) | Mr (calc) | ppm  | Start | End | Miss | Ions | Peptide |                                    |
|-----------|-----------|-----------|------|-------|-----|------|------|---------|------------------------------------|
| 842.5737  | 841.5664  | 841.4844  | 97.5 | 427   | -   | 433  | 0    | ---     | R.ACLLLPR.G                        |
| 842.5737  | 841.5665  | 841.4844  | 97.5 | 427   | -   | 433  | 0    | 14      | R.ACLLLPR.G                        |
| 856.5821  | 855.5748  | 855.4814  | 109  | 360   | -   | 366  | 1    | 2       | R.RNLPQVK.E + 2 Deamidated (NQ)    |
| 856.5821  | 855.5748  | 855.4814  | 109  | 360   | -   | 366  | 1    | ---     | R.RNLPQVK.E + 2 Deamidated (NQ)    |
| 870.6026  | 869.5953  | 869.5446  | 58.3 | 570   | -   | 576  | 1    | ---     | K.IILARER.K                        |
| 870.6026  | 869.5953  | 869.5446  | 58.3 | 570   | -   | 576  | 1    | ---     | K.IILARER.K                        |
| 1297.7300 | 1296.7227 | 1296.5510 | 132  | 560   | -   | 569  | 0    | ---     | K.FDNQEDLWTK.I + 2 Deamidated (NQ) |
| 1419.8638 | 1418.8565 | 1418.7266 | 91.6 | 361   | -   | 372  | 1    | ---     | R.NLPQVKEDSPHR.E                   |
| 1419.8638 | 1418.8565 | 1418.7266 | 91.6 | 361   | -   | 372  | 1    | ---     | R.NLPQVKEDSPHR.E                   |
| 1434.8639 | 1433.8566 | 1433.7527 | 72.4 | 129   | -   | 139  | 1    | ---     | K.IHQNIKQYPR.M + Deamidated (NQ)   |
| 1434.8639 | 1433.8566 | 1433.7527 | 72.5 | 129   | -   | 139  | 1    | ---     | K.IHQNIKQYPR.M + Deamidated (NQ)   |
| 1463.8888 | 1462.8815 | 1462.7528 | 88.0 | 318   | -   | 331  | 0    | ---     | R.VEVIPAGSSPHTNR.R                 |
| 1463.8888 | 1462.8815 | 1462.7528 | 88.0 | 318   | -   | 331  | 0    | ---     | R.VEVIPAGSSPHTNR.R                 |
| 1551.8925 | 1550.8852 | 1550.6871 | 128  | 282   | -   | 293  | 0    | ---     | K.HGCCLVTHPEWR.T                   |
| 1551.8925 | 1550.8852 | 1550.6871 | 128  | 282   | -   | 293  | 0    | ---     | K.HGCCLVTHPEWR.T                   |
| 2050.1382 | 2049.1309 | 2048.9916 | 68.0 | 196   | -   | 215  | 1    | ---     | R.GTGNIQLPGFSGGTWGSERK.K + Deamida |

No match to: 868.5806, 877.1173, 877.1173, 896.5347, 897.6122, 897.6122, 928.5591, 928.5591, 1051.6309, 1051.6309, 1179.6890, 1179.6890, 1259.7749, 1259.7749, 1285.7260, 1285.7260, 1308.7545, 1308.7545, 1320.7034, 1323.7662, 1323.7662, 1331.8176, 1331.8176, 1374.7856, 1375.8502, 1375.8502, 1413.8215, 1493.8533, 1493.8533, 1505.8356, 1505.8356, 1638.9702, 1638.9702, 1707.9005, 1707.9005, 1791.8708, 1791.8709, 1994.1136, 2384.1306, 2399.1768, 2705.3350, 2717.2629

19. [gi|157821627](#) Mass: 65548 Score: 30 Expect: 72 Queries matched: 8

SLAIN motif-containing protein 2 [Rattus norvegicus]

| Observed | Mr (expt) | Mr (calc) | ppm | Start | End | Miss | Ions | Peptide |
|----------|-----------|-----------|-----|-------|-----|------|------|---------|
|----------|-----------|-----------|-----|-------|-----|------|------|---------|



|           |           |           |      |     |   |     |   |     |                                    |
|-----------|-----------|-----------|------|-----|---|-----|---|-----|------------------------------------|
| 868.5806  | 867.5733  | 867.5290  | 51.1 | 580 | - | 586 | 1 | --- | K.LVQPVRR.S + Deamidated (NQ)      |
| 1179.6890 | 1178.6817 | 1178.5965 | 72.3 | 174 | - | 183 | 1 | 23  | K.LDQTMSALKR.Q + Deamidated (NQ);  |
| 1179.6890 | 1178.6817 | 1178.5965 | 72.3 | 174 | - | 183 | 1 | --- | K.LDQTMSALKR.Q + Deamidated (NQ);  |
| 1463.8888 | 1462.8815 | 1462.7086 | 118  | 448 | - | 460 | 1 | --- | R.MQPQASATSQRLK.S + 2 Deamidated ( |
| 1463.8888 | 1462.8815 | 1462.7086 | 118  | 448 | - | 460 | 1 | --- | R.MQPQASATSQRLK.S + 2 Deamidated ( |
| 1707.9005 | 1706.8932 | 1706.8410 | 30.6 | 371 | - | 385 | 1 | --- | R.GIEYSRASPQPMISR.L + Oxidation (M |
| 1707.9005 | 1706.8932 | 1706.8410 | 30.6 | 371 | - | 385 | 1 | --- | R.GIEYSRASPQPMISR.L + Oxidation (M |
| 2705.3350 | 2704.3277 | 2704.2989 | 10.7 | 145 | - | 167 | 1 | --- | K.SVSPLVWCRQVLDYSPDVECAK.K         |

**No match to:** 842.5737, 842.5737, 856.5821, 856.5821, 870.6026, 870.6026, 877.1173, 877.1173, 896.5347, 897.6122, 897.6122, 928.5591, 928.5591, 1051.6309, 1051.6309, 1259.7749, 1259.7749, 1285.7260, 1285.7260, 1297.7300, 1308.7545, 1308.7545, 1320.7034, 1323.7662, 1323.7662, 1331.8176, 1331.8176, 1374.7856, 1375.8502, 1375.8502, 1413.8215, 1419.8638, 1419.8638, 1434.8639, 1434.8639, 1493.8533, 1493.8533, 1505.8356, 1505.8356, 1551.8925, 1551.8925, 1638.9702, 1638.9702, 1791.8708, 1791.8709, 1994.1136, 2050.1382, 2384.1306, 2399.1768, 2717.2629

20. [gi|149041536](#) Mass: 34338 Score: 30 Expect: 75 Queries matched: 5

rCG58022, isoform CRA\_a [Rattus norvegicus]

| Observed  | Mr(expt)  | Mr(calc)  | ppm  | Start | End | Miss | Ions | Peptide |                                      |
|-----------|-----------|-----------|------|-------|-----|------|------|---------|--------------------------------------|
| 1179.6890 | 1178.6817 | 1178.5931 | 75.1 | 240   | -   | 248  | 1    | 24      | R.YQEVLDKQR.Q + Deamidated (NQ)      |
| 1179.6890 | 1178.6817 | 1178.5931 | 75.2 | 240   | -   | 248  | 1    | ---     | R.YQEVLDKQR.Q + Deamidated (NQ)      |
| 1323.7662 | 1322.7589 | 1322.5772 | 137  | 143   | -   | 153  | 1    | ---     | K.QLASRNCSEEEK.C + 2 Deamidated (NQ) |
| 1323.7662 | 1322.7590 | 1322.5772 | 137  | 143   | -   | 153  | 1    | ---     | K.QLASRNCSEEEK.C + 2 Deamidated (NQ) |
| 1994.1136 | 1993.1063 | 1992.8946 | 106  | 46    | -   | 63   | 0    | ---     | K.NLSPPSVSSQMITEESNR.N + 2 Deamida   |

**No match to:** 842.5737, 842.5737, 856.5821, 856.5821, 868.5806, 870.6026, 870.6026, 877.1173, 877.1173, 896.5347, 897.6122, 897.6122, 928.5591, 928.5591, 1051.6309, 1051.6309, 1259.7749, 1259.7749, 1285.7260, 1285.7260, 1297.7300, 1308.7545, 1308.7545, 1320.7034, 1331.8176, 1331.8176, 1374.7856, 1375.8502, 1375.8502, 1413.8215, 1419.8638, 1419.8638, 1434.8639, 1434.8639, 1463.8888, 1463.8888, 1493.8533, 1493.8533, 1505.8356, 1505.8356, 1551.8925, 1551.8925, 1638.9702, 1638.9702, 1707.9005, 1707.9005, 1791.8708, 1791.8709, 2050.1382, 2384.1306, 2399.1768, 2705.3350, 2717.2629

## Search Parameters

Type of search : Sequence Query  
 Enzyme : Trypsin  
 Fixed modifications : Carbamidomethyl (C)  
 Variable modifications : Deamidated (NQ), Oxidation (M)  
 Mass values : Monoisotopic  
 Protein Mass : Unrestricted  
 Peptide Mass Tolerance :  $\pm 250$  ppm  
 Fragment Mass Tolerance:  $\pm 0.4$  Da  
 Max Missed Cleavages : 1  
 Instrument type : MALDI-TOF-TOF  
 Query1 (842.5737,1+) : <no title>  
 Query2 (842.5737,1+) : Locus:1.G4.2.1.25  
 Query3 (856.5821,1+) : Locus:1.G4.2.1.18  
 Query4 (856.5821,1+) : <no title>  
 Query5 (868.5806,1+) : <no title>  
 Query6 (870.6026,1+) : Locus:1.G4.2.1.23  
 Query7 (870.6026,1+) : <no title>  
 Query8 (877.1173,1+) : <no title>  
 Query9 (877.1173,1+) : Locus:1.G4.2.1.12  
 Query10 (896.5347,1+) : <no title>  
 Query11 (897.6122,1+) : Locus:1.G4.2.1.22  
 Query12 (897.6122,1+) : <no title>

Query13 (928.5591,1+) : Locus:1.G4.2.1.20  
Query14 (928.5591,1+) : <no title>  
Query15 (1051.6309,1+) : Locus:1.G4.2.1.17  
Query16 (1051.6309,1+) : <no title>  
Query17 (1179.6890,1+) : Locus:1.G4.2.1.19  
Query18 (1179.6890,1+) : <no title>  
Query19 (1259.7749,1+) : Locus:1.G4.2.1.14  
Query20 (1259.7749,1+) : <no title>  
Query21 (1285.7260,1+) : Locus:1.G4.2.1.24  
Query22 (1285.7260,1+) : <no title>  
Query23 (1297.7300,1+) : <no title>  
Query24 (1308.7545,1+) : <no title>  
Query25 (1308.7545,1+) : Locus:1.G4.2.1.15  
Query26 (1320.7034,1+) : <no title>  
Query27 (1323.7662,1+) : <no title>  
Query28 (1323.7662,1+) : Locus:1.G4.2.1.13  
Query29 (1331.8176,1+) : <no title>  
Query30 (1331.8176,1+) : Locus:1.G4.2.1.9  
Query31 (1374.7856,1+) : <no title>  
Query32 (1375.8502,1+) : <no title>  
Query33 (1375.8502,1+) : Locus:1.G4.2.1.21  
Query34 (1413.8215,1+) : <no title>  
Query35 (1419.8638,1+) : Locus:1.G4.2.1.6  
Query36 (1419.8638,1+) : <no title>  
Query37 (1434.8639,1+) : Locus:1.G4.2.1.7  
Query38 (1434.8639,1+) : <no title>  
Query39 (1463.8888,1+) : Locus:1.G4.2.1.4  
Query40 (1463.8888,1+) : <no title>  
Query41 (1493.8533,1+) : Locus:1.G4.2.1.10  
Query42 (1493.8533,1+) : <no title>  
Query43 (1505.8356,1+) : Locus:1.G4.2.1.8  
Query44 (1505.8356,1+) : <no title>  
Query45 (1551.8925,1+) : Locus:1.G4.2.1.16  
Query46 (1551.8925,1+) : <no title>  
Query47 (1638.9702,1+) : <no title>  
Query48 (1638.9702,1+) : Locus:1.G4.2.1.11  
Query49 (1707.9005,1+) : <no title>  
Query50 (1707.9005,1+) : Locus:1.G4.2.1.5  
Query51 (1791.8708,1+) : <no title>  
Query52 (1791.8709,1+) : Locus:1.G4.2.1.2  
Query53 (1994.1136,1+) : <no title>  
Query54 (2050.1382,1+) : <no title>  
Query55 (2384.1306,1+) : <no title>  
Query56 (2399.1768,1+) : <no title>  
Query57 (2705.3350,1+) : <no title>  
Query58 (2717.2629,1+) : <no title>

Mascot: <http://www.matrixscience.com/>
